# Supplementary material
Source: PubMed Central journal article supplement (PMC6300639)
Supplement: b78922b70711d20208180b42343791a9_IAI.00523-18-s0004.pdf [file b78922b70711d20208180b42343791a9_IAI.00523-18-s0004.pdf]

## Supplementary Table 1

### Potential PKG substrates in *P. falciparum* schizonts

[R/K]xx[S/T]

| GeneID          | Gene product                                            | Predicted phosphosite    |
|-----------------|---------------------------------------------------------|--------------------------|
| PF3D7_0802600   | adenylyl cyclase beta (ACbeta)                          | DHMRAQ <b>S</b> IDHVDK   |
| PF3D7_0414900   | armadillo-domain containing rhoptyr protein (ARO)       | TIRKLL <b>S</b> FTSNDI   |
| PF3D7_1212900   | bromodomain protein, putative                           | GVKRSAS <b>S</b> NKFDDF  |
| PF3D7_0217500   | calcium-dependent protein kinase 1 (CDPK1)              | KVRKLG <b>S</b> GAYGEV   |
| PF3D7_0618000   | conserved Plasmodium membrane protein, unknown function | RENRIY <b>S</b> MKTDDN   |
| PF3D7_0618000   | conserved Plasmodium membrane protein, unknown function | NYPKNI <b>S</b> QITIKT   |
| PF3D7_0618000   | conserved Plasmodium membrane protein, unknown function | SFEKIK <b>S</b> FVSNNT   |
| PF3D7_0704300   | conserved Plasmodium membrane protein, unknown function | TQKKVP <b>S</b> NSSFNI   |
| PF3D7_1464500   | conserved Plasmodium membrane protein, unknown function | IGRKNS <b>S</b> LNIQDV   |
| PF3D7_1126700   | conserved Plasmodium protein, unknown function          | PIRKENS <b>S</b> LHISKYD |
| PF3D7_0210900   | conserved Plasmodium protein, unknown function          | FKGRTG <b>S</b> FGSRVF   |
| PF3D7_0308300   | conserved Plasmodium protein, unknown function          | NNSKNS <b>S</b> HLYNEI   |
| PF3D7_0407800   | conserved Plasmodium protein, unknown function          | QYHKFK <b>S</b> DLGLIY   |
| PF3D7_0522400   | conserved Plasmodium protein, unknown function          | DEHKNI <b>S</b> FTHSDN   |
| PF3D7_0611600   | conserved Plasmodium protein, unknown function          | EHFRQR <b>S</b> ITIMQD   |
| PF3D7_1008100   | conserved Plasmodium protein, unknown function          | FLSKHNS <b>S</b> ENLNLI  |
| PF3D7_1029400   | conserved Plasmodium protein, unknown function          | KNKKNV <b>S</b> FEEKLY   |
| PF3D7_1142100   | conserved Plasmodium protein, unknown function          | DNEKAT <b>S</b> DLSSIH   |
| PF3D7_1327300   | conserved Plasmodium protein, unknown function          | LEKKIP <b>S</b> IEDSQK   |
| PF3D7_1346400   | conserved Plasmodium protein, unknown function          | IYIRGV <b>S</b> NKSEVT   |
| PF3D7_1304200.1 | CorA-like Mg2 transporter protein, putative             | LSRKENS <b>S</b> INSSTL  |
| PF3D7_1251200   | coronin                                                 | EHLKHI <b>S</b> SIHEEN   |
| PF3D7_0623100   | coronin binding protein, putative                       | SKNRV <b>S</b> SAHNKKG   |
| PF3D7_1434500   | dynein-related AAA-type ATPase, putative                | VFERNK <b>S</b> DNFNIS   |
| PF3D7_0515700   | glideosome-associated protein 40, putative (GAP40)      | EHSRAA <b>T</b> FKSKSK   |
| PF3D7_0515700   | glideosome-associated protein 40, putative (GAP40)      | KLSRNY <b>S</b> SKQHEM   |
| PF3D7_0624000   | hexokinase (HK)                                         | TYTKLD <b>T</b> IECDIP   |
| PF3D7_1105100   | histone H2B (H2B)                                       | KAKKTG <b>T</b> GPDGKK   |
| PF3D7_0316700   | HVA22/TB2/DP1 family protein, putative                  | SLKRIS <b>S</b> NVFG EK  |
| PF3D7_1347200   | nucleoside transporter 1 (NT1)                          | STGKES <b>S</b> KAYADI   |
| PF3D7_0824400   | nucleoside transporter 2 (NT2)                          | SLTKND <b>S</b> NSVGIK   |
| PF3D7_0824400   | nucleoside transporter 2 (NT2)                          | NENKTL <b>S</b> LTHSKK   |
| PF3D7_0424600   | Plasmodium exported protein (PHISTb), unknown function  | NENRLN <b>T</b> IGNLFE   |
| PF3D7_0730900   | Plasmodium exported protein, unknown function           | KVEKEM <b>S</b> IHDGMK   |
| PF3D7_1360900   | polyadenylate-binding protein, putative                 | VLLKSS <b>S</b> NETNKR   |
| PF3D7_1340900   | sodium-dependent phosphate transporter (PiT)            | GTQKTG <b>S</b> VEAHHV   |

|               |                                                         |                |
|---------------|---------------------------------------------------------|----------------|
| PF3D7_0730300 | transcription factor with AP2 domain(s) (AP2-L)         | ELKRNSSDGQNKH  |
| PF3D7_1129900 | transporter, putative                                   | ISKREMSNDNVN   |
| PF3D7_1021700 | conserved Plasmodium membrane protein, unknown function | KIKRKLSDFIPTK  |
| PF3D7_1308000 | conserved Plasmodium membrane protein, unknown function | CGLKKVSFGEFNE  |
| PF3D7_1464500 | conserved Plasmodium membrane protein, unknown function | NIGRKNSSLNIQD  |
| PF3D7_0407800 | conserved Plasmodium protein, unknown function          | TNYKRETELYDKI  |
| PF3D7_1029400 | conserved Plasmodium protein, unknown function          | FLRRKRSFIFNDY  |
| PF3D7_0709700 | lysophospholipase, putative                             | KISRKSSTGSSSS  |
| PF3D7_1342600 | myosin A (MyoA)                                         | KIVRRVSNVEAFD  |
| PF3D7_0506900 | rhomboid protease ROM4 (ROM4)                           | NNEKKE SFSINGD |

**[R/K]xx[S/T][Φ]**

| <b>GeneID</b>   | <b>Gene product</b>                                     | <b>Predicted phosphosite</b> |
|-----------------|---------------------------------------------------------|------------------------------|
| PF3D7_0802600   | adenylyl cyclase beta (ACbeta)                          | DHMRAQSIDHVDK                |
| PF3D7_0414900   | armadillo-domain containing rhoptry protein (ARO)       | TIRKLLSFTSNDI                |
| PF3D7_0618000   | conserved Plasmodium membrane protein, unknown function | SFEKIKSFVSNNT                |
| PF3D7_1464500   | conserved Plasmodium membrane protein, unknown function | IGRKNSSLNIQDV                |
| PF3D7_1126700   | conserved Plasmodium protein, unknown function          | PIRKENSLHISKYD               |
| PF3D7_0210900   | conserved Plasmodium protein, unknown function          | FKGRTGSFSGSRVF               |
| PF3D7_0522400   | conserved Plasmodium protein, unknown function          | DEHKNISFTHSDN                |
| PF3D7_0611600   | conserved Plasmodium protein, unknown function          | EHRQR SITIMQD                |
| PF3D7_1029400   | conserved Plasmodium protein, unknown function          | KNKKNVSFEELY                 |
| PF3D7_1327300   | conserved Plasmodium protein, unknown function          | LEKKIPSIEDSQK                |
| PF3D7_1304200.1 | CorA-like Mg <sup>2</sup> transporter protein, putative | LSRKENSINSSTL                |
| PF3D7_0515700   | glideosome-associated protein 40, putative (GAP40)      | EHSRAATFKSKSK                |
| PF3D7_0624000   | hexokinase (HK)                                         | TYTKLDTIECDIP                |
| PF3D7_0824400   | nucleoside transporter 2 (NT2)                          | NENKTL SLTHSKK               |
| PF3D7_0424600   | Plasmodium exported protein (PHISTb), unknown function  | NENRLNTIGNLFE                |
| PF3D7_0730900   | transcription factor with AP2 domain(s) (AP2-L)         | ELKRNSSDGQNKH                |
| PF3D7_1340900   | sodium-dependent phosphate transporter (PiT)            | GTQKTGSVEAHHV                |
| PF3D7_1308000   | conserved Plasmodium membrane protein, unknown function | CGLKKVSFGEFNE                |
| PF3D7_1029400   | conserved Plasmodium protein, unknown function          | FLRRKRSFIFNDY                |
| PF3D7_0506900   | rhomboid protease ROM4 (ROM4)                           | NNEKKE SFSINGD               |

**[R/K][R/H/K]x[S/T]**

| <b>GeneID</b> | <b>Gene product</b>                                     | <b>Predicted phosphosite</b> |
|---------------|---------------------------------------------------------|------------------------------|
| PF3D7_1008100 | conserved Plasmodium protein, unknown function          | FLSKHNSNENLNI                |
| PF3D7_1251200 | coronin                                                 | EHLKHISSIHEEN                |
| PF3D7_1021700 | conserved Plasmodium membrane protein, unknown function | KIKRKLSDFIPTK                |
| PF3D7_1308000 | conserved Plasmodium membrane protein, unknown function | CGLKKVSFGEFNE                |

|               |                                                         |                |
|---------------|---------------------------------------------------------|----------------|
| PF3D7_1464500 | conserved Plasmodium membrane protein, unknown function | NIGRKNSSLNIQD  |
| PF3D7_0407800 | conserved Plasmodium protein, unknown function          | TNYKRETELYDKI  |
| PF3D7_1029400 | conserved Plasmodium protein, unknown function          | FLRRKR SFIFNDY |
| PF3D7_0709700 | lysophospholipase, putative                             | KISRKSSTGSSSS  |
| PF3D7_1342600 | myosin A (MyoA)                                         | KIVRRVSNVEAFD  |
| PF3D7_0506900 | rhomboid protease ROM4 (ROM4)                           | NNEKKE SFSINGD |

### Potential PKG phosphorylation sites in PfrPT1

[R/K]xx[S/T]

QPERFVTLGIDPP  
 GTGKTLTARAIAAN  
 ATNRPDTLDSALV  
 IRARRKTITEKDL  
 ARRKTI TEKDLLL  
 HGCKQFSATGKYM

### Potential PKG phosphorylation sites in PfHSP90

[R/K]xx[S/T]

EEKKKKTGEDKNA  
 RKKKIHTVEHEWE  
 SFYKSLTNDWEDH  
 LAVKHF SVEGQLE  
 ELLRFQTSKSGDE

### Potential PKG substrates in *P. berghei* ookinetes

| [R/K]xx[S/T]       | [R/K]xx[S/T][Φ]    | [R/K]xx[T]         | [R/K][R/H/K]x[S/T] |
|--------------------|--------------------|--------------------|--------------------|
| PBANKA_010080-851  | PBANKA_020700-541  | PBANKA_031210-523  | PBANKA_010080-851  |
| PBANKA_010220-826  | PBANKA_020760-1004 | PBANKA_041065-125  | PBANKA_040110-1064 |
| PBANKA_020700-541  | PBANKA_021050-2220 | PBANKA_041490-104  | PBANKA_040170-347  |
| PBANKA_020760-1004 | PBANKA_021320-35   | PBANKA_041490-21   | PBANKA_041490-104  |
| PBANKA_020880-717  | PBANKA_030070-168  | PBANKA_050830-547  | PBANKA_050830-450  |
| PBANKA_021050-2220 | PBANKA_031210-523  | PBANKA_052150-604  | PBANKA_060080-140  |
| PBANKA_021320-35   | PBANKA_040820-11   | PBANKA_060560-83   | PBANKA_061740-376  |
| PBANKA_030070-168  | PBANKA_041065-125  | PBANKA_060790-49   | PBANKA_080160-797  |
| PBANKA_030400-1    | PBANKA_041490-104  | PBANKA_060950-666  | PBANKA_080410-1526 |
| PBANKA_030450-1580 | PBANKA_041490-21   | PBANKA_070710-468  | PBANKA_082360-72   |
| PBANKA_031190-36   | PBANKA_041730-1106 | PBANKA_071500-771  | PBANKA_090390-671  |
| PBANKA_031210-523  | PBANKA_050830-36   | PBANKA_080320-479  | PBANKA_090790-1732 |
| PBANKA_040110-1064 | PBANKA_051810-347  | PBANKA_080630-1192 | PBANKA_090940-450  |

**[R/K]xx[S/T]**

PBANKA\_040170-347  
PBANKA\_041065-125  
PBANKA\_041450-33  
PBANKA\_041490-104  
PBANKA\_041490-21  
PBANKA\_041730-1106  
PBANKA\_050830-36  
PBANKA\_050830-450  
PBANKA\_050830-547  
PBANKA\_051270-48  
PBANKA\_051600-68  
PBANKA\_051700-194  
PBANKA\_051810-183  
PBANKA\_051810-347  
PBANKA\_052150-604  
PBANKA\_052290-17  
PBANKA\_060080-140  
PBANKA\_060170-380  
PBANKA\_060560-83  
PBANKA\_060740-1391  
PBANKA\_060790-49  
PBANKA\_060950-666  
PBANKA\_060950-839  
PBANKA\_060960-86  
PBANKA\_061240-1054  
PBANKA\_061550-288  
PBANKA\_061580-780  
PBANKA\_061740-376  
PBANKA\_061890-116  
PBANKA\_070660-569  
PBANKA\_070710-468  
PBANKA\_071500-771  
PBANKA\_080160-797  
PBANKA\_080320-479  
PBANKA\_080410-1526  
PBANKA\_080630-1192  
PBANKA\_080630-924  
PBANKA\_080670-3342

**[R/K]xx[S/T]****[R/K]xx[S/T][Φ]**

PBANKA\_060170-380  
PBANKA\_070710-468  
PBANKA\_080160-797  
PBANKA\_080410-1526  
PBANKA\_080630-1192  
PBANKA\_080670-3342  
PBANKA\_081480-18  
PBANKA\_081700-19  
PBANKA\_081740-1347  
PBANKA\_081960-114  
PBANKA\_082360-72  
PBANKA\_082490-782  
PBANKA\_090790-2065  
PBANKA\_090790-859  
PBANKA\_090940-450  
PBANKA\_091860-956  
PBANKA\_092660-529  
PBANKA\_100540-1518  
PBANKA\_100790-16  
PBANKA\_102050-167  
PBANKA\_102310-1105  
PBANKA\_102960-129  
PBANKA\_103050-801  
PBANKA\_110440-490  
PBANKA\_110850-2373  
PBANKA\_111520-15  
PBANKA\_111530-407  
PBANKA\_112200-234  
PBANKA\_112680-8491  
PBANKA\_112840-224  
PBANKA\_113670-2072  
PBANKA\_114370-773  
PBANKA\_121660-337  
PBANKA\_121850-117  
PBANKA\_122840-183  
PBANKA\_123200-252  
PBANKA\_123200-362  
PBANKA\_123710-1219

**[R/K]xx[S/T][Φ]****[R/K]xx[T]**

PBANKA\_081480-18  
PBANKA\_090790-900  
PBANKA\_090980-542  
PBANKA\_093130-239  
PBANKA\_100790-174  
PBANKA\_102310-1201  
PBANKA\_102310-161  
PBANKA\_112520-749  
PBANKA\_121850-117  
PBANKA\_122380-740  
PBANKA\_123200-231  
PBANKA\_123200-329  
PBANKA\_123370-64  
PBANKA\_130680-1228  
PBANKA\_133470-385  
PBANKA\_133950-626  
PBANKA\_140200-1368  
PBANKA\_141680-549

**[R/K][R/H/K]x[S/T]**

PBANKA\_100540-1518  
PBANKA\_110850-2372  
PBANKA\_112520-749  
PBANKA\_112840-224  
PBANKA\_113670-2072  
PBANKA\_121590-1047  
PBANKA\_121660-337  
PBANKA\_122840-183  
PBANKA\_132320-790  
PBANKA\_132950-413  
PBANKA\_135570-19  
PBANKA\_140620-814  
PBANKA\_141680-353

**[R/K]xx[S/T]**

PBANKA\_081840-1454  
PBANKA\_081960-114  
PBANKA\_082360-72  
PBANKA\_082490-782  
PBANKA\_090390-671  
PBANKA\_090790-1079  
PBANKA\_090790-1142  
PBANKA\_090790-1732  
PBANKA\_090790-2065  
PBANKA\_090790-859  
PBANKA\_090790-900  
PBANKA\_090940-450  
PBANKA\_090980-542  
PBANKA\_091860-491  
PBANKA\_091860-956  
PBANKA\_091970-233  
PBANKA\_091990-83  
PBANKA\_092250-545  
PBANKA\_092660-529  
PBANKA\_092720-298  
PBANKA\_092820-81  
PBANKA\_093130-239  
PBANKA\_100450-430  
PBANKA\_100540-1518  
PBANKA\_100550-183  
PBANKA\_100790-16  
PBANKA\_100790-174  
PBANKA\_100920-1425  
PBANKA\_102050-167  
PBANKA\_102310-1105  
PBANKA\_102310-1201  
PBANKA\_102310-161  
PBANKA\_102800-410  
PBANKA\_102960-129  
PBANKA\_103050-801  
PBANKA\_103380-5960  
PBANKA\_103400-175  
PBANKA\_103710-349  
PBANKA\_110440-490

**[R/K]xx[S/T][Φ]**

PBANKA\_133490-281  
PBANKA\_133490-703  
PBANKA\_133490-747  
PBANKA\_134250-1408  
PBANKA\_135470-255  
PBANKA\_136160-128  
PBANKA\_140620-814  
PBANKA\_141680-549  
PBANKA\_142690-173  
PBANKA\_145250-151  
PBANKA\_146050-462

**[R/K]xx[S/T]**

PBANKA\_110460-1115  
PBANKA\_110850-2372  
PBANKA\_110850-2373  
PBANKA\_111000-157  
PBANKA\_111520-15  
PBANKA\_111530-407  
PBANKA\_112200-234  
PBANKA\_112520-749  
PBANKA\_112650-15  
PBANKA\_112680-8491  
PBANKA\_112840-224  
PBANKA\_112890-46  
PBANKA\_113400-1048  
PBANKA\_113570-61  
PBANKA\_113590-1124  
PBANKA\_113670-2072  
PBANKA\_113780-999  
PBANKA\_114370-773  
PBANKA\_121300-2303  
PBANKA\_121470-688  
PBANKA\_121500-75  
PBANKA\_121590-1047  
PBANKA\_121660-337  
PBANKA\_121850-117  
PBANKA\_122240-137  
PBANKA\_122380-740  
PBANKA\_122510-200  
PBANKA\_122830-1068  
PBANKA\_122840-183  
PBANKA\_123200-231  
PBANKA\_123200-252  
PBANKA\_123200-329  
PBANKA\_123200-362  
PBANKA\_123370-64  
PBANKA\_123710-1219  
PBANKA\_130680-1228  
PBANKA\_130680-1521  
PBANKA\_131170-280  
PBANKA\_131610-449  
PBANKA\_131920-721

**[R/K]xx[S/T]**

PBANKA\_132320-790

PBANKA\_132790-15

PBANKA\_132950-413

PBANKA\_133470-385

PBANKA\_133490-281

PBANKA\_133490-703

PBANKA\_133490-747

PBANKA\_133540-1140

PBANKA\_133950-1002

PBANKA\_133950-626

PBANKA\_134250-1408

PBANKA\_134340-1101

PBANKA\_135470-255

PBANKA\_135570-19

PBANKA\_136160-128

PBANKA\_140200-1368

PBANKA\_140290-330

PBANKA\_140620-814

PBANKA\_141130-267

PBANKA\_141680-353

PBANKA\_141680-549

PBANKA\_142330-129

PBANKA\_142500-149

PBANKA\_142690-173

PBANKA\_142890-275

PBANKA\_142890-782

PBANKA\_143610-33

PBANKA\_145020-157

PBANKA\_145250-151

PBANKA\_146050-462
