# Supplementary material
Source: PubMed Central journal article supplement (PMC6300639)

## Supplementary Figure 2

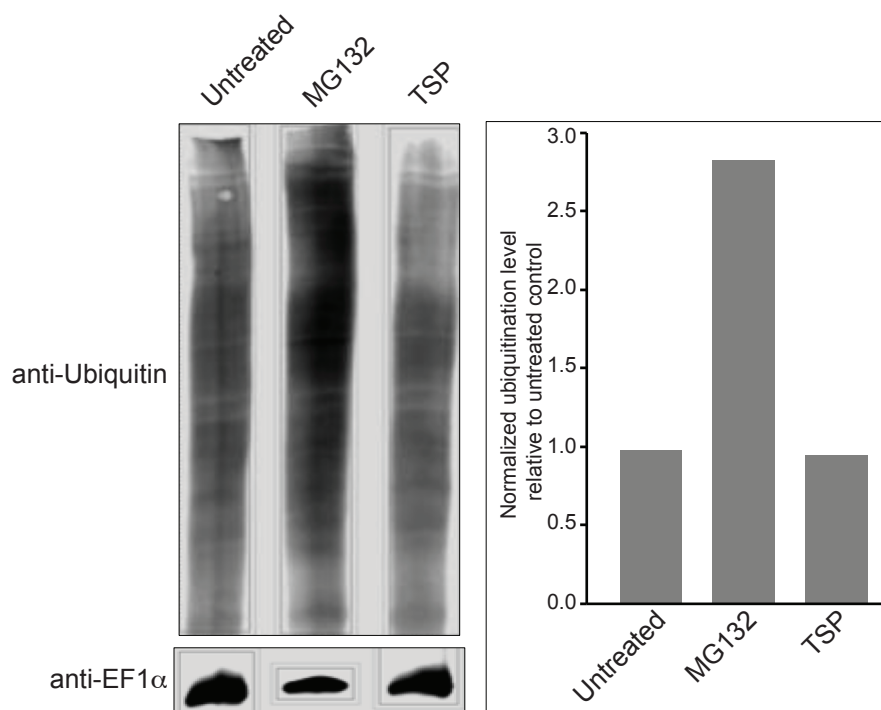

Supplement: 231e1a24c18efe27a8a299c766136e7c_IAI.00523-18-s0002.pdf [file 231e1a24c18efe27a8a299c766136e7c_IAI.00523-18-s0002.pdf]

### Supplementary Figure 3

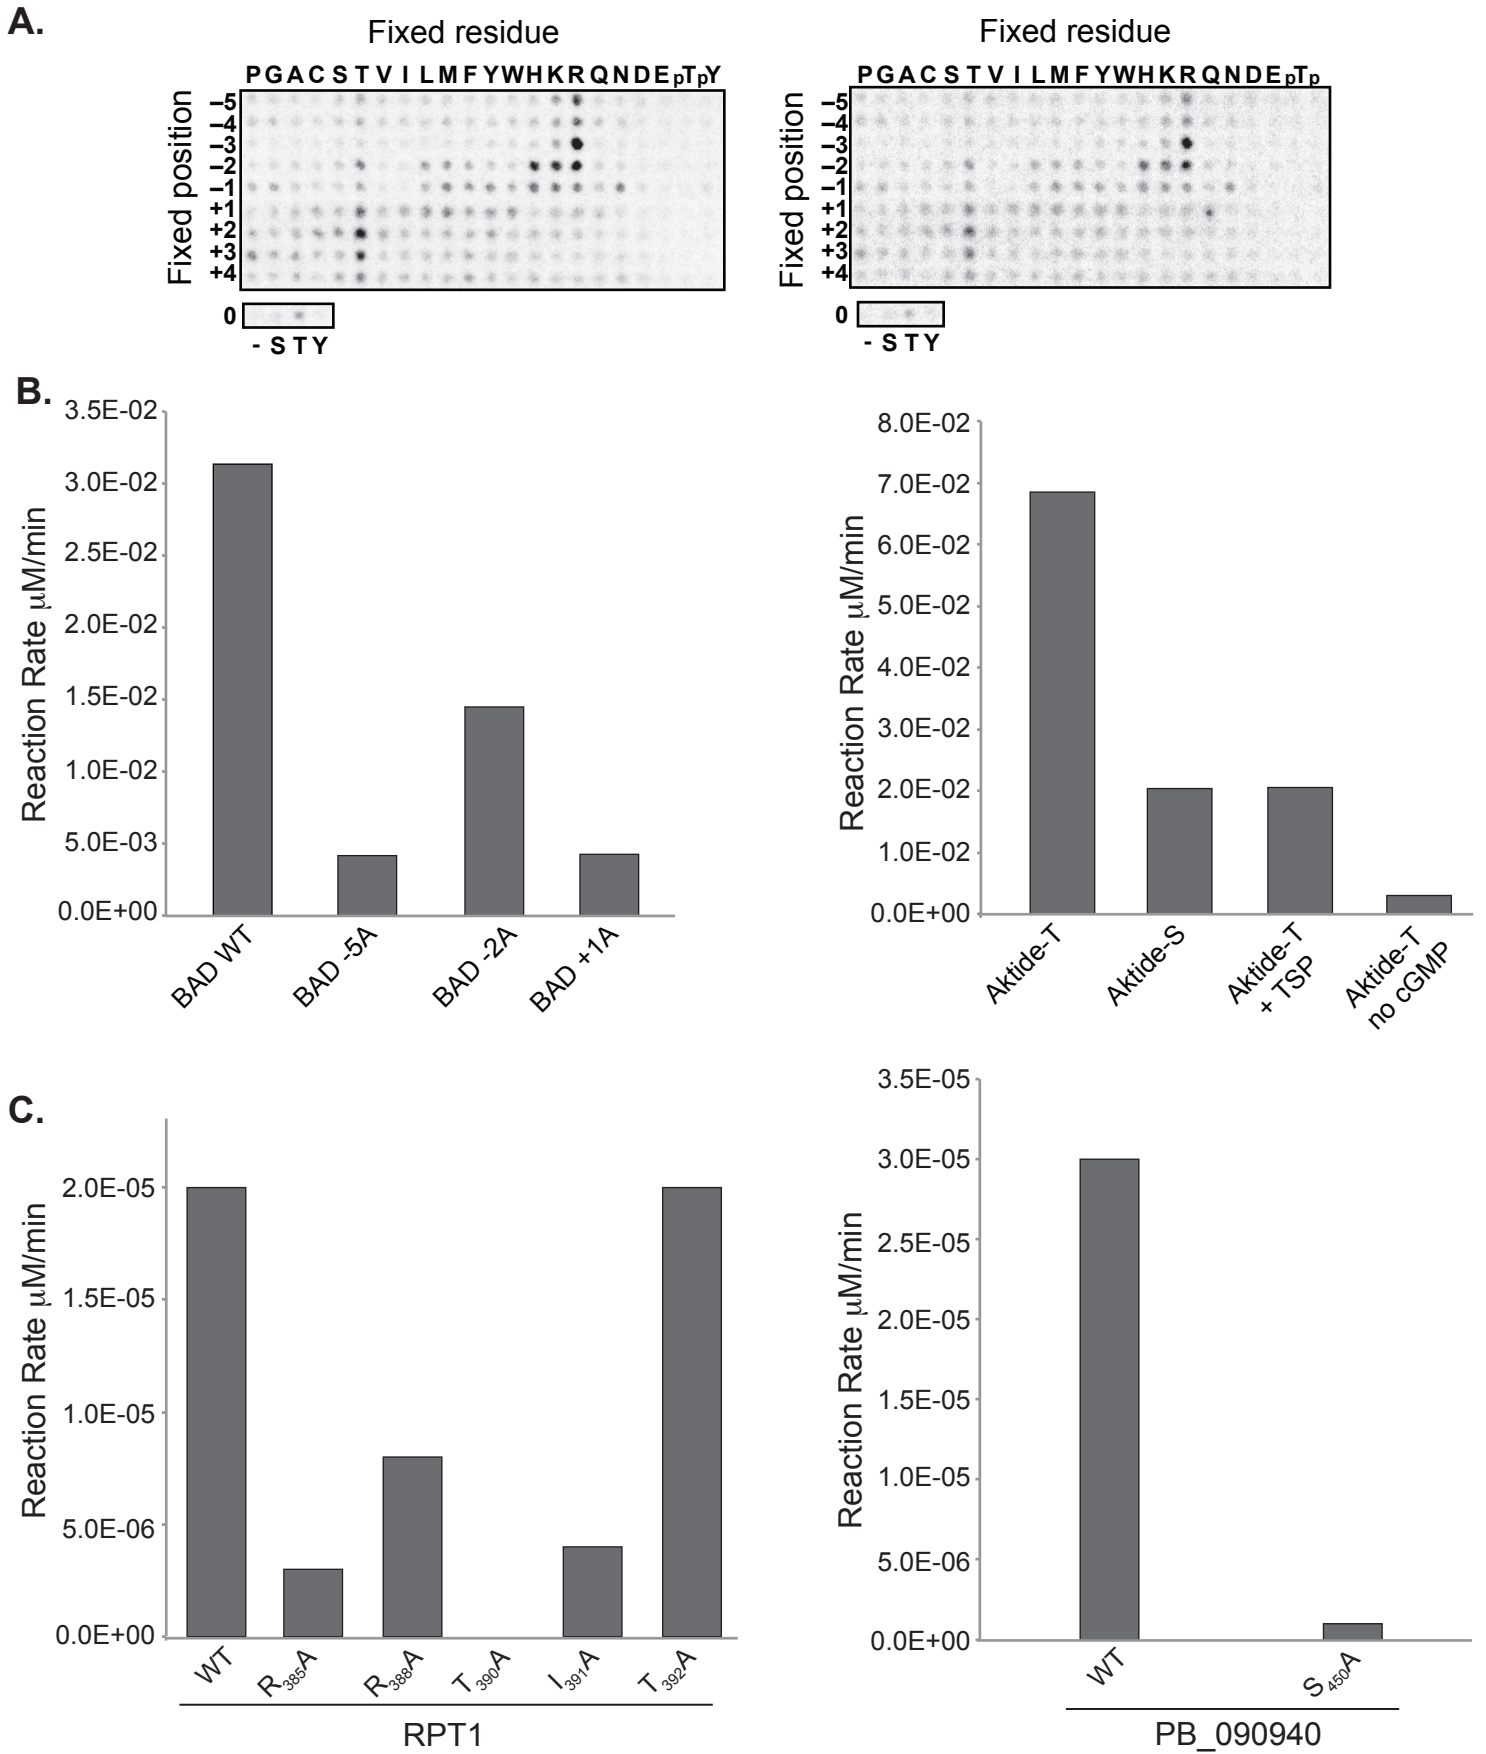

Supplement: 2ac24168793b970174baa96c41a741ce_IAI.00523-18-s0003.pdf [file 2ac24168793b970174baa96c41a741ce_IAI.00523-18-s0003.pdf]

# Supplementary Figure 1

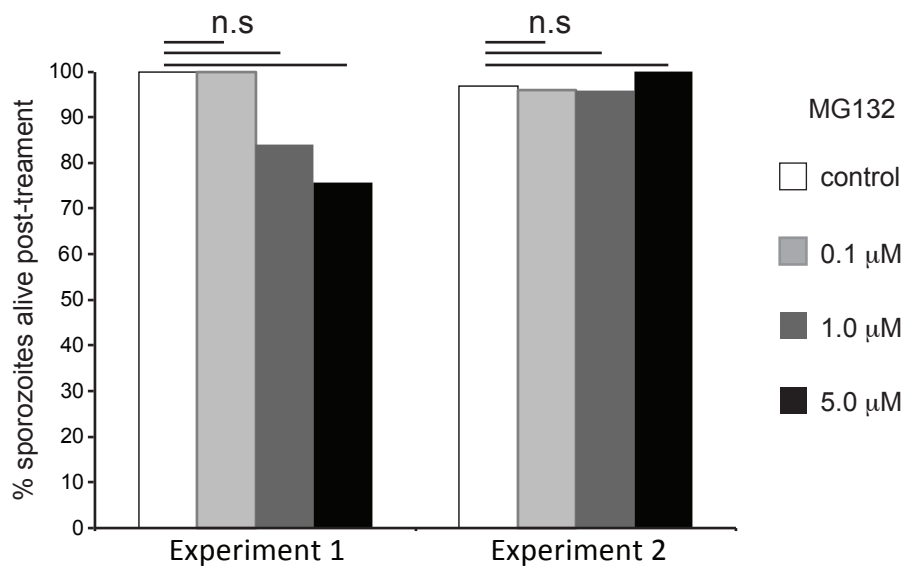

Supplement: 804198e7ef88cc066252dfd65a28cae2_IAI.00523-18-s0001.pdf [file 804198e7ef88cc066252dfd65a28cae2_IAI.00523-18-s0001.pdf]
